# Supplementary material for: The helicase-binding domain of Escherichia coli DnaG primase interacts with the highly conserved C-terminal region of single-stranded DNA-binding protein
Source: PubMed Central journal article supplement — Nucleic Acids Res. 2013 Feb 20;41(8):4507–17. doi: 10.1093/nar/gkt107 (PMC3632105; doi:10.1093/nar/gkt107), 2013-02-20
Supplement: supp_gkt107_nar-03296-m-2012-File008.pdf [file supp_gkt107_nar-03296-m-2012-File008.pdf]

## Supplementary Data

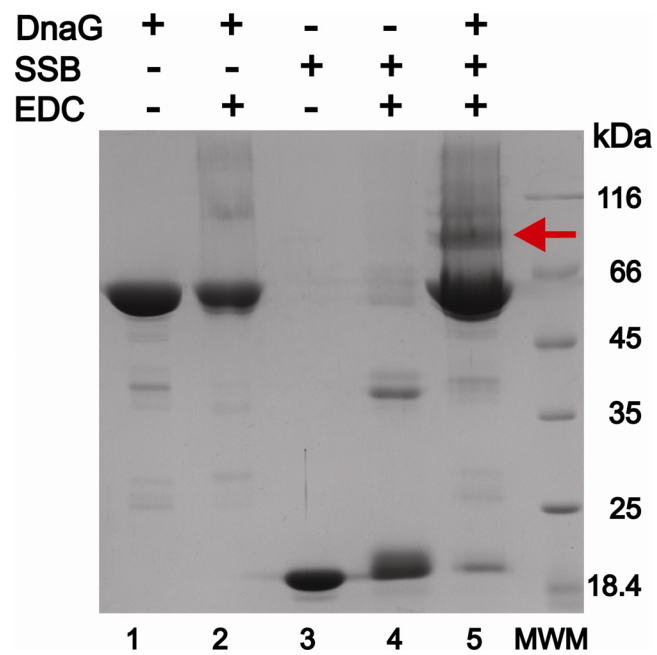

**Supplementary Figure S1: Cross-link of DnaG primase with EcoSSB.** Reactions were performed in 1 mM potassium phosphate buffer pH 7.4, 1 mM NaCl, 8% (w/v) glycerol and 1 mM DTT, using 25  $\mu$ M DnaG, 5  $\mu$ M EcoSSB and 50 mM EDC. After incubation of EcoSSB with DnaG and EDC (lane 5), cross-link bands were obtained (red arrow), which did not appear in reactions missing one of the respective protein partners (lane 2 and 4). 12% SDS-PAGE.

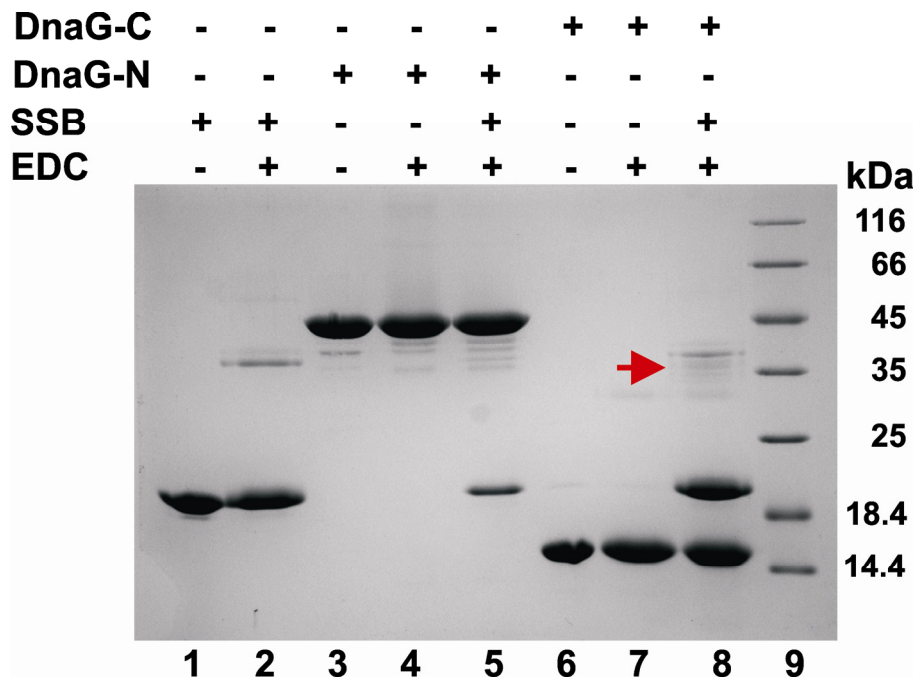

**Supplementary Figure S2: Cross-link experiments of DnaG-N and DnaG-C with EcoSSB.** Reactions were performed in 1 mM potassium phosphate buffer pH 7.4, 1 mM NaCl, 8% (w/v) glycerol and 1 mM DTT, using 25  $\mu$ M DnaG variant, 5  $\mu$ M EcoSSB and 50 mM EDC. Aliquots corresponding to 7.4  $\mu$ g of the respective DnaG variant were applied to a 13.5% SDS PAGE. After incubation of EcoSSB with DnaG-C and EDC (lane 8), additional cross-link bands of higher apparent molecular weights were obtained (red arrow), which did not appear in reactions missing DnaG-C (lane 2). In the case of DnaG-N, no such cross-link bands could be detected.

| Protein          | Binding constant ( $K_A$ )      |
|------------------|---------------------------------|
| DnaG-C wild-type | $8.6 \cdot 10^4 \text{ M}^{-1}$ |
| K447A            | n/d                             |
| T450A            | $2.8 \cdot 10^4 \text{ M}^{-1}$ |
| R452A            | n/d                             |
| K478A            | $6.2 \cdot 10^4 \text{ M}^{-1}$ |
| K518A            | n/d                             |
| K528A            | $7.4 \cdot 10^4 \text{ M}^{-1}$ |

**Supplementary Table S1: Overview of binding constants of DnaG-C variants and EcoSSB as determined by analytical ultracentrifugation.** In the case of the K447A, R452A and K518A mutants of DnaG-C, the binding affinity was so weak that no binding constant could be determined (n/d). For details see Figure 3.



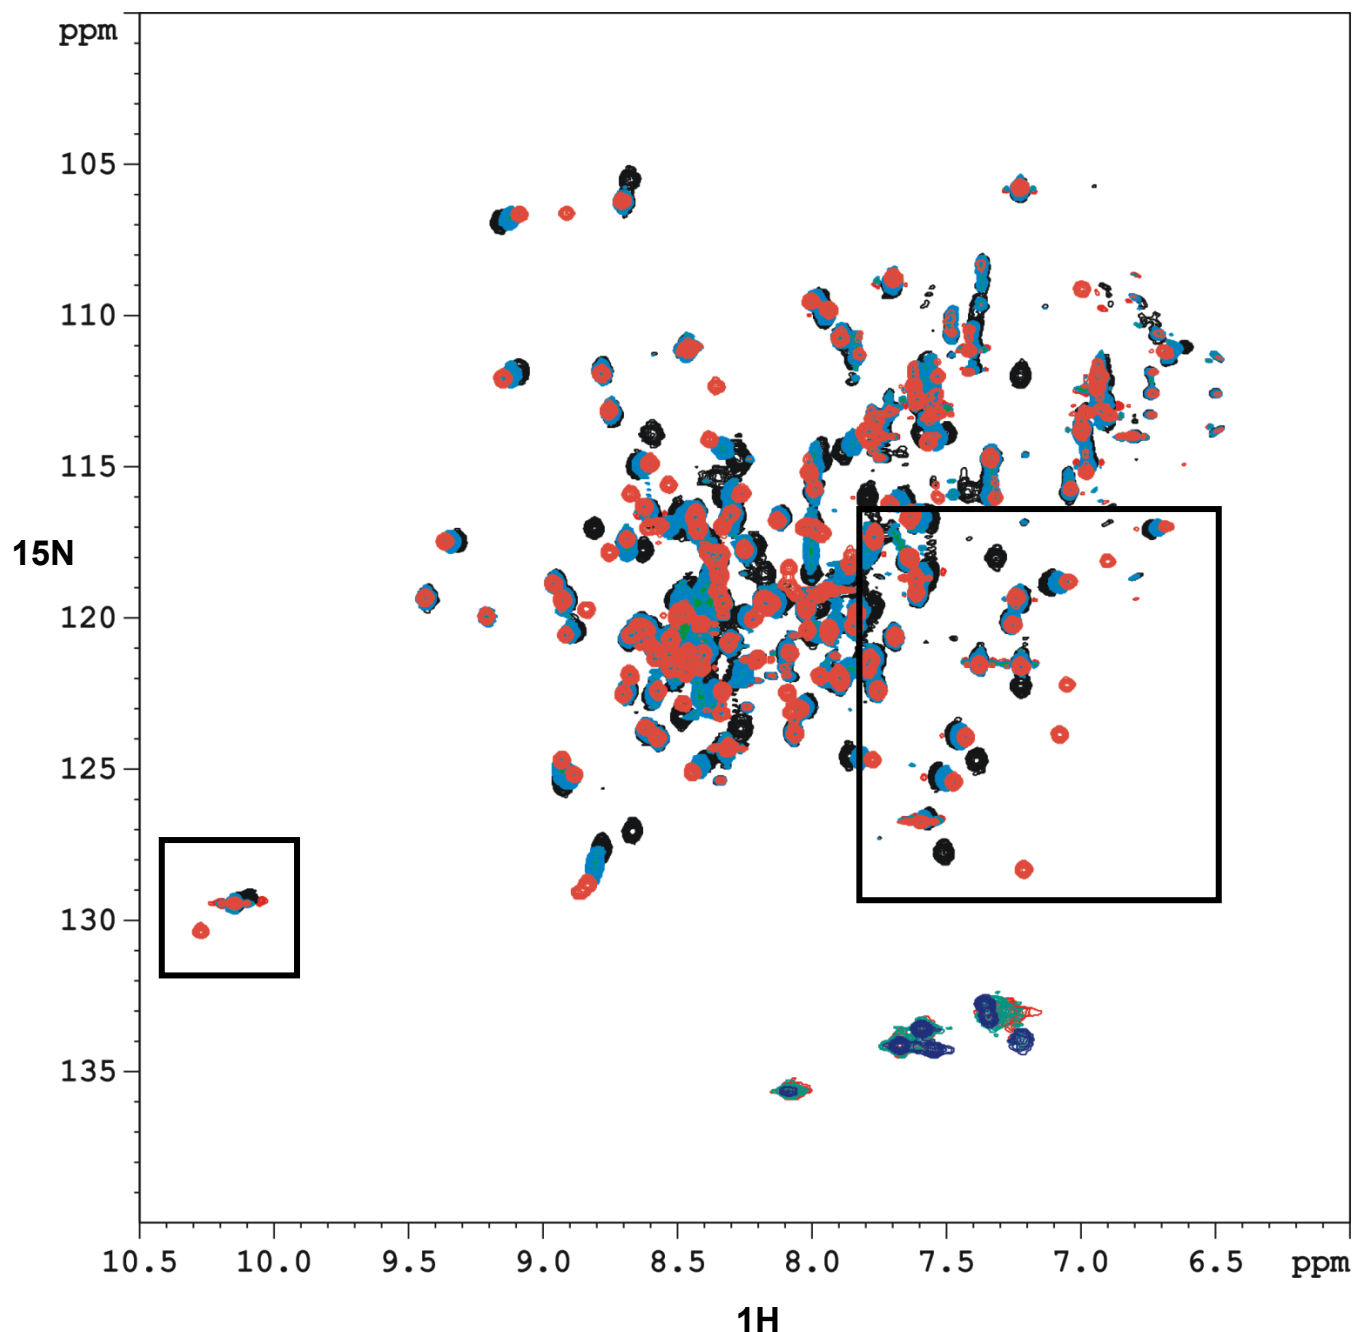

**Supplementary Figure S4: Overlay of  $^{15}\text{N}$ -SOFAST-HMQC-spectra of  $^{15}\text{N}$ -DnaG-C (300  $\mu\text{M}$ ) titrated with increasing concentrations of the SSB-Carb peptide.** The spectra were recorded at 600 MHz and 295 K. Spectra with peptide concentrations of 0, 100  $\mu\text{M}$  and 300  $\mu\text{M}$  are shown in black, blue and orange, respectively. Hardly any changes were visible at higher concentrations of the peptide, the spectra are therefore omitted. Regions in black frames are shown in more detail in Supplementary Figures S5 and S6.

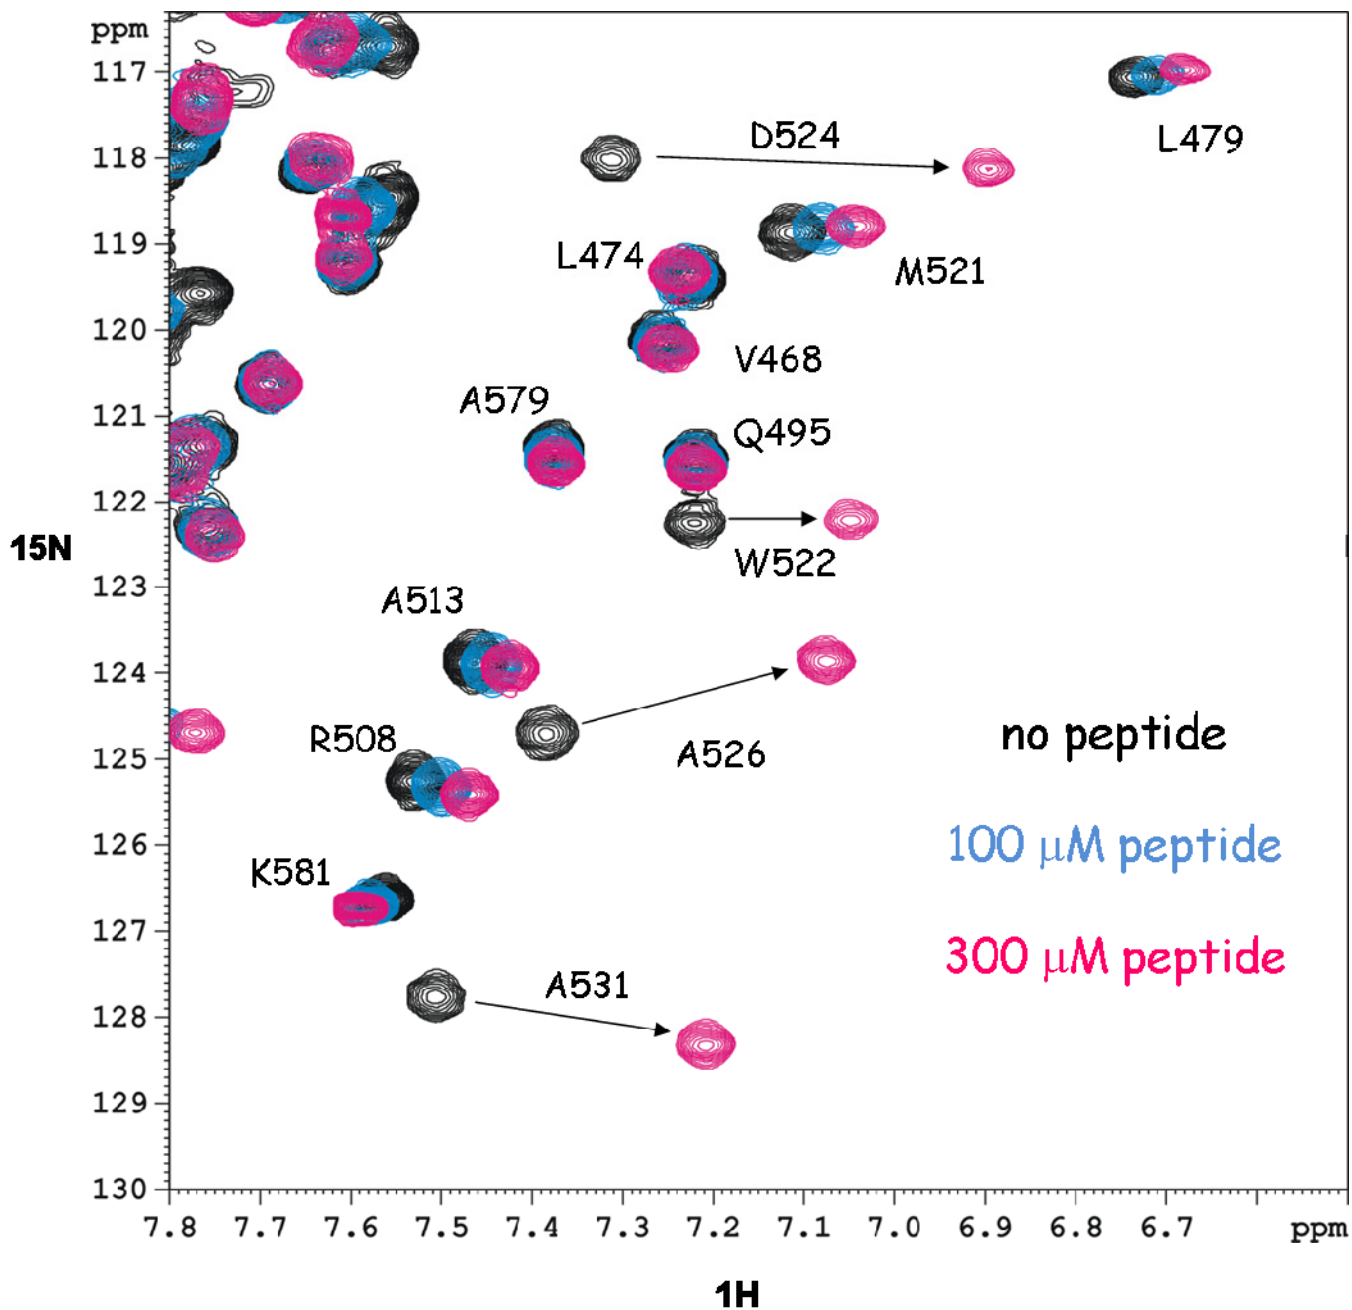

**Supplementary Figure S5: Overlay of a region of the  $^{15}\text{N}$ -SOFAST-HMQC-spectra of  $^{15}\text{N}$ -DnaG-C (300  $\mu\text{M}$ ) titrated with increasing concentrations of SSB-Carb. Note that several peaks are missing in the blue spectrum (100  $\mu\text{M}$  SSB-Carb peptide) which is typical for a ligand in fast exchange.**

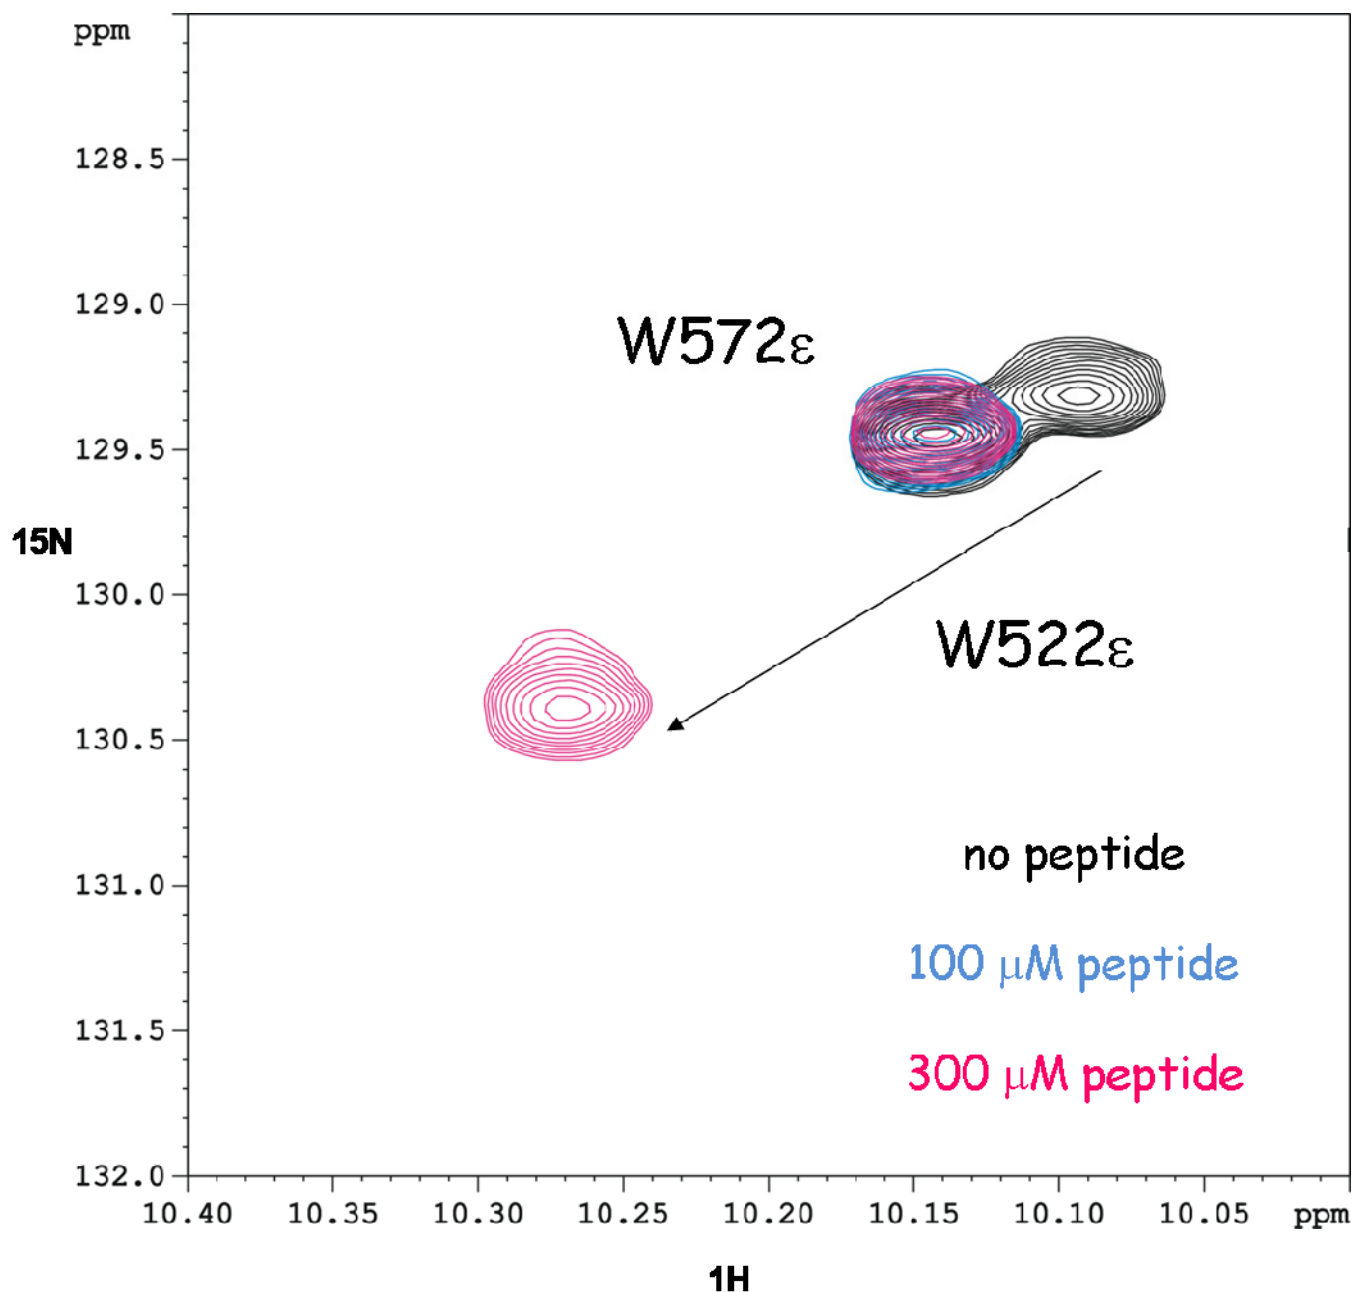

**Supplementary Figure S6: Overlay of the region of the  $\text{HN}^{\epsilon 1}$  resonances in the  $^{15}\text{N}$ -SOFAST-HMQC-spectra of  $^{15}\text{N}$ -DnaG-C (300  $\mu\text{M}$ ) titrated with increasing concentrations of SSB-Carb. While the peak of the W572 side chain shows no changes, the peak of W522 exhibits a strong shift upon an increase of the peptide concentration to 300  $\mu\text{M}$ . Note that this peak is missing in the blue spectrum (100  $\mu\text{M}$  SSB-Carb peptide) which is typical for a ligand in fast exchange.**

| Sequence | Difference  | Sequence | Difference   | Sequence | Difference  |
|----------|-------------|----------|--------------|----------|-------------|
| 435Ala   |             | 484Leu   | 0.08         | 533Gln   | 0.15        |
| 436Glu   | 0.01        | 485Phe   | 0.09         | 534Thr   | 0.06        |
| 437Ser   | 0.03        | 486Arg   | 0.19         | 535Phe   | 0.02        |
| 438Gly   | 0.01        | 487Glu   | 0.04         | 536Thr   | 0.03        |
| 439Val   | 0.00        | 488Leu   | 0.08         | 537Asp   | 0.07        |
| 440Ser   | 0.01        | 489Val   | 0.05         | 538Ser   | 0.03        |
| 441Arg   | 0.02        | 490Asn   | 0.06         | 539Leu   | 0.10        |
| 442Pro   |             | 491Thr   | 0.04         | 540Asn   | 0.07        |
| 443Val   | 0.14        | 492Cys   | 0.05         | 541His   | 0.15        |
| 444Pro   |             | 493Leu   | 0.01         | 542Met   | 0.15        |
| 445Gln   | 0.09        | 494Ser   | 0.03         | 543Phe   | 0.12        |
| 446Leu   | 0.21        | 495Gln   | 0.02         | 544Asp   | 0.06        |
| 447Lys   | n.a. - w.p. | 496Pro   |              | 545Ser   | 0.05        |
| 448Arg   | n.a. - w.p. | 497Gly   | 0.02         | 546Leu   | 0.02        |
| 449Thr   | n.a. - w.p. | 498Leu   | 0.03         | 547Leu   | 0.10        |
| 450Thr   | 0.69        | 499Thr   | 0.01         | 548Glu   | 0.09        |
| 451Met   | 0.32        | 500Thr   | 0.02         | 549Leu   | 0.03        |
| 452Arg   | 0.54        | 501Gly   | 0.01         | 550Arg   | 0.03        |
| 453Ile   | 0.11        | 502Gln   | 0.02         | 551Gln   | 0.04        |
| 454Leu   | 0.27        | 503Leu   | 0.02         | 552Glu   | 0.04        |
| 455Ile   | 0.02        | 504Leu   | 0.09         | 553Glu   | 0.02        |
| 456Gly   | 0.27        | 505Glu   | 0.09         | 554Leu   | 0.02        |
| 457Leu   | 0.03        | 506His   | 0.17         | 555Ile   | 0.03        |
| 458Leu   | 0.08        | 507Tyr   | 0.11         | 556Ala   | 0.03        |
| 459Val   | 0.13        | 508Arg   | 0.09         | 557Arg   | 0.02        |
| 460Gln   | 0.19        | 509Gly   | 0.09         | 558Glu   | 0.05        |
| 461Asn   | 0.06        | 510Thr   | 0.03         | 559Arg   | 0.04        |
| 462Pro   |             | 511Asn   | n.p. - w.p.  | 560Thr   | 0.09        |
| 463Glu   | 0.03        | 512Asn   | 0.10         | 561His   | 0.07        |
| 464Leu   | 0.04        | 513Ala   | 0.04         | 562Gly   | 0.08        |
| 465Ala   | 0.02        | 514Ala   | 0.10         | 563Leu   | 0.04        |
| 466Thr   | 0.01        | 515Thr   | 0.21         | 564Ser   | 0.01        |
| 467Leu   | 0.01        | 516Leu   | 0.14         | 565Asn   | n.p. - w.p. |
| 468Val   | 0.02        | 517Glu   | 0.06         | 566Glu   | 0.03        |
| 469Pro   |             | 518Lys   | 0.28         | 567Glu   | 0.00        |
| 470Pro   |             | 519Leu   | 0.16         | 568Arg   | 0.01        |
| 471Leu   | 0.03        | 520Ser   | 0.28         | 569Leu   | 0.00        |
| 472Glu   | 0.04        | 521Met   | 0.08         | 570Glu   | 0.01        |
| 473Asn   | 0.05        | 522Trp   | 0.18         | 571Leu   | 0.01        |
| 474Leu   | 0.00        | 523Asp   | 0.30         | 572Trp   | 0.00        |
| 475Asp   | 0.07        | 524Asp   | 0.43         | 573Thr   | 0.02        |
| 476Glu   | 0.07        | 525Ile   | not assigned | 574Leu   | 0.02        |
| 477Asn   | 0.07        | 526Ala   | 0.33         | 575Asn   | 0.01        |
| 478Lys   | 0.07        | 527Asp   | 0.06         | 576Gln   | 0.02        |
| 479Leu   | 0.05        | 528Lys   | 0.14         | 577Glu   | 0.02        |
| 480Pro   |             | 529Asn   | 0.04         | 578Leu   | 0.04        |
| 481Gly   | 0.28        | 530Ile   | 0.37         | 579Ala   | 0.03        |
| 482Leu   | 0.41        | 531Ala   | 0.32         | 580Lys   | 0.08        |
| 483Gly   | 0.08        | 532Glu   | 0.14         | 581Lys   | 0.06        |

**Supplementary Table S2: Changes in chemical shift for the amino proton and nitrogen resonances in the backbone of DnaG-C after addition of 1 mM SSB-Carb peptide.** The shift was calculated using the formula:  $\text{shift} = \sqrt{[(\Delta\delta(^1\text{H}))^2 + (\Delta\delta(^{15}\text{N})/10)^2]}$  (where  $\Delta\delta$  is the difference in chemical shift in the respective dimensions). I525 could not be assigned in either spectrum (“not assigned”), N511 and N565 did not show a peak in the  $^1\text{H}$ ,  $^{15}\text{N}$  correlation without peptide (“n.p. – w.p.”). K447, R448 and T449 could not be assigned unambiguously in the spectra without peptide (“n.a. – w.p.”). The nitrogen bound proton in the side chain of W522 showed a significant shift as well, larger than that of the backbone amide proton (see Supplementary Figure S6).



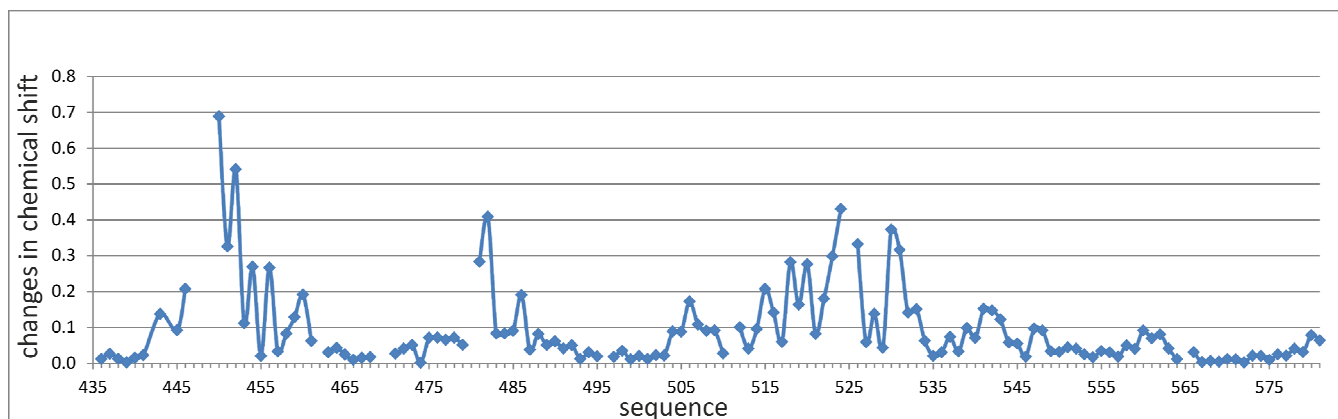

|            |            |            |             |     |
|------------|------------|------------|-------------|-----|
| AAESGVS    | RPVPQLKRTT | MRILIGLLVQ | NPELATLVPP  | 470 |
| LENLDENKLP | GLGLFRELVN | TCLSQPGLTT | GQLLEHYRGT  | 510 |
| NNAATLEKLS | MWDDIADKNI | AEQTFDLSLN | HMFDLSLLELR | 550 |
| QEELIARERT | HGLSNEERLE | LWTLNQELAK | K           | 581 |

**Supplementary Figure S7: Graphical representation of the data from Supplementary Table S2.** A change in shift above 0.1 ppm indicates an interaction, those parts of the protein that show an interaction with SSB-Carb can be easily recognized. For comparison, the amino acid sequence of DnaG-C is given.
